# Supplementary material for: Simplified models to assess newborn gestational age in low-middle income countries: findings from a multicountry, prospective cohort study
Source: PubMed Central journal article supplement (PMC8438948; doi:10.1136/bmjgh-2021-005688), 2021-09-13

**WEBAPPENDIX: WHO AMANHI Gestational Age Study**

*Machine Learning Models to Assess Newborn Gestational Age in Low-Middle Income Countries: Findings from a multi-country, prospective cohort study*

**Table of Contents**

|                                                                                                                            |    |
|----------------------------------------------------------------------------------------------------------------------------|----|
| Web Table 1: Detailed description of the Study Sites and Procedures .....                                                  | 2  |
| Web Table 2. Diagnostic accuracy of Ballard, LMP, and AMANHI models for identification of newborns <37 and <34 weeks ..... | 3  |
| Web Table 3. Stratified analysis by SGA vs AGA Status.....                                                                 | 5  |
| Web Figure 2a-f. Bangladesh Bland Altman Curves.....                                                                       | 5  |
| Web Figure 3a-f. Ghana Bland Altman Curves.....                                                                            | 7  |
| Web Figure 4a-f. Pakistan (Karachi) Bland Altman Curves.....                                                               | 8  |
| Web Figure 5a-f. Tanzania (Pemba) Bland Altman Curves .....                                                                | 10 |
| Web Figure 6a-f. Zambia Bland Altman Curves .....                                                                          | 11 |
| Web Figure 7a-e. Receiver Operating Curves for the identification of newborns <37 weeks.....                               | 12 |
| Web Figure 8.a-e Receiver Operating Curves for the identification of newborns <34 weeks.....                               | 12 |
| Web Figure 9a-d. ROC Curves by AGA and SGA for classification of newborns <37 weeks and <34 weeks.....                     | 12 |

**Web Table 1: Detailed description of the Study Sites and Procedures**

|                                                         | <b>Bangladesh</b>                                                                                                                                                                  | <b>Ghana</b>                                                                                                                | <b>Pakistan (Karachi)</b>                                                                                                                                         | <b>Tanzania (Pemba)</b>                                                                                                       | <b>Zambia</b>                                                                                                |
|---------------------------------------------------------|------------------------------------------------------------------------------------------------------------------------------------------------------------------------------------|-----------------------------------------------------------------------------------------------------------------------------|-------------------------------------------------------------------------------------------------------------------------------------------------------------------|-------------------------------------------------------------------------------------------------------------------------------|--------------------------------------------------------------------------------------------------------------|
| <b>Site Location/ Description</b>                       | Rural areas of Sylhet district                                                                                                                                                     | Rural areas in central Ghana                                                                                                | 1 peri-urban community of Bin Qasim town and 1 peri-urban community of Korangi town, Karachi                                                                      | Pemba Island in the Zanzibar archipelago                                                                                      | 6 rural districts in Southern Province                                                                       |
| <b>Pregnancy surveillance</b>                           | 2-monthly by trained community health workers (CHWs)                                                                                                                               | Monthly fieldworkers (FW)                                                                                                   | 3-monthly by FWs                                                                                                                                                  | 6-weekly by CHWs                                                                                                              | Facility ANC enrollment                                                                                      |
| <b>Population area<sup>1</sup></b>                      | 88,000                                                                                                                                                                             | 147,000                                                                                                                     | 97000                                                                                                                                                             | 72,000                                                                                                                        | 25,000                                                                                                       |
| <b>Ultrasonography</b>                                  | Fujifilm Sonosite M-Turbo® ultrasound system (Bothel, WA, US). Scans performed by trained MD sonographers.                                                                         | Portable SonoSite™ S180 machines (SonoSite™, Inc, Bothel, WA, US). Scan performed by hospital midwives.                     | Mindray 7 Ultrasound System. Scan done by trained sonologist.                                                                                                     | Sonoscape s6. Scans performed by trained sonographer in district hospitals.                                                   | Philips Sono Diagnost 260; Scans performed by trained sonographers.                                          |
| <b>% Facility Delivery<sup>1</sup></b>                  | 43.7                                                                                                                                                                               | 79.9                                                                                                                        | 64.3                                                                                                                                                              | 99 (?)                                                                                                                        | 97.1                                                                                                         |
| <b>% with newborn visit completed &lt;72 hours</b>      | 71.1%                                                                                                                                                                              | 99.2%                                                                                                                       | 80.0%                                                                                                                                                             | 92.7%                                                                                                                         | 82.6%                                                                                                        |
| <b>Infant Weighing Scale</b>                            | TANITA BD-585 Pediatric Scale Digital weighing scale. Precision 10 gm.                                                                                                             | Salter suspension scale (non-digital) with sling. Precision 100 gm.                                                         | LAICA Electronic/digital infant scale. Precision 5 gm.                                                                                                            | Seca 374 (capacity 44lb Digital infant weighing scale Precision 10 gm                                                         | GPC Gps092 Medical hanging scale (Delhi, India). Precision 100 grams.                                        |
| <b>Health worker type performing newborn assessment</b> | Locally recruited women (non-clinical) with at least 10 grade education received 6 weeks training on maternal and newborn health; additional 7 days training on newborn assessment | Locally recruited non-clinical field supervisors with secondary school education. Trained for 7 days on newborn assessment. | Locally recruited women with at least 12 grade education received 6 month training on maternal and newborn care; additional 7 days training on newborn assessment | Trained health worker (health assistant) with 2 years formal health training. Initial 7 days training for newborn assessment. | Locally recruited women (non-clinical) with 12 years of schooling; Trained for 3 days on newborn assessment. |
| <b>% SGA<sup>1</sup></b>                                | 41.8                                                                                                                                                                               | 33.4                                                                                                                        | 35.5                                                                                                                                                              | 9.6                                                                                                                           | 17.8                                                                                                         |
| <b>% LBW<sup>1</sup></b>                                | 25.6                                                                                                                                                                               | 11.8                                                                                                                        | 22.5                                                                                                                                                              | 4.6                                                                                                                           | 6.5                                                                                                          |
| <b>NMR<sup>1</sup></b>                                  | 37.8<br>(35.5-40.2)                                                                                                                                                                | 29.1<br>(26.9-31.2)                                                                                                         | 50.1<br>(46.9-53.4)                                                                                                                                               | 16.0<br>(14.3-17.8)                                                                                                           | 14.5<br>(13.0-16.0)                                                                                          |

<sup>1</sup>Population-based rates, timing, and causes of maternal deaths, stillbirths, and neonatal deaths in south Asia and sub-Saharan Africa: a multi-country prospective cohort study. Lancet Glob Health 2018; 6(12): e1297-e308.

**Web Table 2. Diagnostic accuracy of Ballard, LMP, and AMANHI models for identification of <37 week and <34 week infants**

Gold standard dated by early pregnancy ultrasound, additional clinical thresholds maximizing sensitivity for identification of preterm births.

| Model                            | AUC  | Threshold selection | Se   | Sp   | PPV  | NPV  | LRP   | LRN  |
|----------------------------------|------|---------------------|------|------|------|------|-------|------|
| <b>Classify &lt;37 weeks</b>     |      |                     |      |      |      |      |       |      |
| LMP                              | 0.81 | Youden Index        | 0.76 | 0.76 | 0.20 | 0.96 | 2.38  | 0.51 |
| LMP                              | 0.81 | 95% sensitivity     | 0.95 | 0.23 | 0.09 | 0.98 | 1.23  | 0.22 |
| LMP                              | 0.81 | 90% sensitivity     | 0.90 | 0.36 | 0.11 | 0.98 | 1.66  | 0.22 |
| LMP                              | 0.81 | 85% sensitivity     | 0.85 | 0.61 | 0.14 | 0.98 | 2.17  | 0.25 |
| Ballard exam                     | 0.74 | Youden Index        | 0.63 | 0.71 | 0.15 | 0.96 | 2.20  | 0.52 |
| Ballard                          | 0.74 | 95% sensitivity     | 0.95 | 0.25 | 0.09 | 0.98 | 1.26  | 0.20 |
| Ballard                          | 0.74 | 90% sensitivity     | 0.90 | 0.37 | 0.10 | 0.98 | 1.42  | 0.27 |
| Ballard                          | 0.74 | 85% sensitivity     | 0.85 | 0.45 | 0.11 | 0.97 | 1.55  | 0.33 |
| Model A (10-characteristics)     | 0.88 | Youden Index        | 0.78 | 0.82 | 0.25 | 0.98 | 4.35  | 0.27 |
| Model A                          | 0.88 | 95% sensitivity     | 0.95 | 0.45 | 0.12 | 0.99 | 1.74  | 0.11 |
| Model A                          | 0.88 | 90% sensitivity     | 0.90 | 0.64 | 0.16 | 0.99 | 2.48  | 0.16 |
| Model A                          | 0.88 | 85% sensitivity     | 0.85 | 0.73 | 0.20 | 0.98 | 3.15  | 0.21 |
| Model B (10-characteristics+LMP) | 0.91 | Youden Index        | 0.82 | 0.85 | 0.30 | 0.98 | 5.40  | 0.21 |
| Model B                          | 0.91 | 95% sensitivity     | 0.95 | 0.52 | 0.13 | 0.99 | 1.96  | 0.10 |
| Model B                          | 0.91 | 90% sensitivity     | 0.90 | 0.71 | 0.19 | 0.99 | 3.07  | 0.14 |
| Model B                          | 0.91 | 85% sensitivity     | 0.85 | 0.81 | 0.26 | 0.99 | 4.49  | 0.19 |
| Model C (BW+LMP)                 | 0.88 | Youden Index        | 0.76 | 0.84 | 0.27 | 0.98 | 4.83  | 0.29 |
| Model C                          | 0.88 | 95% sensitivity     | 0.95 | 0.42 | 0.11 | 0.99 | 1.65  | 0.12 |
| Model C                          | 0.88 | 90% sensitivity     | 0.90 | 0.60 | 0.15 | 0.99 | 2.27  | 0.17 |
| Model C                          | 0.88 | 85% sensitivity     | 0.85 | 0.72 | 0.19 | 0.98 | 3.03  | 0.21 |
| Model D (BW+HC)                  | 0.84 | Youden Index        | 0.74 | 0.79 | 0.22 | 0.97 | 3.53  | 0.33 |
| Model D                          | 0.84 | 95% sensitivity     | 0.95 | 0.38 | 0.11 | 0.99 | 1.54  | 0.13 |
| Model D                          | 0.84 | 90% sensitivity     | 0.90 | 0.54 | 0.13 | 0.99 | 1.97  | 0.18 |
| Model D                          | 0.84 | 85% sensitivity     | 0.85 | 0.65 | 0.16 | 0.98 | 2.40  | 0.23 |
| <b>Classify &lt;34 weeks</b>     |      |                     |      |      |      |      |       |      |
| LMP                              | 0.94 | Youden Index        | 0.88 | 0.84 | 0.05 | 1.00 | 5.58  | 0.14 |
| LMP                              | 0.94 | 95% sensitivity     | 0.95 | 0.74 | 0.03 | 1.00 | 3.65  | 0.07 |
| LMP                              | 0.94 | 90% sensitivity     | 0.90 | 0.82 | 0.04 | 1.00 | 5.13  | 0.12 |
| LMP                              | 0.94 | 85% sensitivity     | 0.85 | 0.87 | 0.06 | 1.00 | 6.57  | 0.17 |
| Ballard                          | 0.89 | Youden Index        | 0.81 | 0.80 | 0.03 | 1.00 | 4.04  | 0.24 |
| Ballard                          | 0.89 | 95% sensitivity     | 0.95 | 0.53 | 0.02 | 1.00 | 2.02  | 0.09 |
| Ballard                          | 0.89 | 90% sensitivity     | 0.90 | 0.67 | 0.02 | 1.00 | 2.70  | 0.15 |
| Ballard                          | 0.89 | 85% sensitivity     | 0.85 | 0.75 | 0.03 | 1.00 | 3.39  | 0.20 |
| Model A (10-characteristics)     | 0.94 | Youden Index        | 0.84 | 0.93 | 0.10 | 1.00 | 12.28 | 0.17 |
| Model A                          | 0.94 | 95% sensitivity     | 0.95 | 0.62 | 0.02 | 1.00 | 2.47  | 0.08 |
| Model A                          | 0.94 | 90% sensitivity     | 0.90 | 0.83 | 0.05 | 1.00 | 5.39  | 0.12 |
| Model A                          | 0.94 | 85% sensitivity     | 0.85 | 0.92 | 0.09 | 1.00 | 10.93 | 0.16 |
| Model B (10-characteristics+LMP) | 0.96 | Youden Index        | 0.87 | 0.95 | 0.12 | 1.00 | 15.91 | 0.14 |
| Model B                          | 0.96 | 95% sensitivity     | 0.95 | 0.72 | 0.03 | 1.00 | 3.38  | 0.07 |
| Model B                          | 0.96 | 90% sensitivity     | 0.90 | 0.90 | 0.08 | 1.00 | 9.11  | 0.11 |
| Model B                          | 0.96 | 85% sensitivity     | 0.85 | 0.96 | 0.16 | 1.00 | 22.01 | 0.16 |
| Model C (BW+LMP)                 | 0.96 | Youden Index        | 0.88 | 0.93 | 0.10 | 1.00 | 12.88 | 0.13 |
| Model C                          | 0.96 | 95% sensitivity     | 0.95 | 0.78 | 0.04 | 1.00 | 4.25  | 0.06 |
| Model C                          | 0.96 | 90% sensitivity     | 0.90 | 0.91 | 0.08 | 1.00 | 9.56  | 0.11 |
| Model C                          | 0.96 | 85% sensitivity     | 0.85 | 0.95 | 0.14 | 1.00 | 18.71 | 0.16 |
| Model D (BW+HC)                  | 0.93 | Youden Index        | 0.82 | 0.92 | 0.08 | 1.00 | 9.72  | 0.19 |
| Model D                          | 0.93 | 95% sensitivity     | 0.95 | 0.56 | 0.02 | 1.00 | 2.18  | 0.09 |

|         |      |                 |      |      |      |      |      |      |
|---------|------|-----------------|------|------|------|------|------|------|
| Model D | 0.93 | 90% sensitivity | 0.90 | 0.78 | 0.04 | 1.00 | 4.10 | 0.13 |
| Model D | 0.93 | 85% sensitivity | 0.85 | 0.88 | 0.06 | 1.00 | 7.19 | 0.17 |

**Web Table 3. Stratified analysis by SGA vs AGA Status**

| Model                                   | SGA                  |                                  |        | AGA                  |                                  |        |
|-----------------------------------------|----------------------|----------------------------------|--------|----------------------|----------------------------------|--------|
|                                         | Mean Difference      | Bland Altman Limits of Agreement | BA LOA | Mean Difference      | Bland Altman Limits of Agreement | BA LOA |
| <b>LMP</b>                              | -0.64 (-1.52, -0.25) | (-40.6, 39.3)                    | 40.0   | -1.42 (-2.54, -1.98) | (-41.2, 37.3)                    | 39.2   |
| <b>Ballard</b>                          | 4.85 (4.31, 5.39)    | (-19.7, 29.4)                    | 24.6   | 10.53 (10.19, 10.86) | (-13.0, 34.1)                    | 23.5   |
| <b>Model A (10 characteristics)</b>     | -5.05 (-5.38, -4.71) | (-20.1, 10.0)                    | 15.0   | 1.66 (1.43, 1.88)    | (-14.4, 17.7)                    | 16.0   |
| <b>Model B (10 characteristics+LMP)</b> | -4.03 (-4.35, -3.72) | (-18.2, 10.1)                    | 14.2   | 1.31 (1.10, 1.52)    | (-13.3, 15.9)                    | 14.6   |
| <b>Model C (BW+LMP)</b>                 | -4.49 (-4.83, -4.15) | (-19.8, 10.9)                    | 15.4   | 1.50 (1.29, 1.72)    | (-13.8, 16.8)                    | 15.3   |
| <b>Model D (BW+HC)</b>                  | -5.61 (-5.95, -5.27) | (-20.9, 9.7)                     | 15.3   | 1.93 (1.68, 2.17)    | (-15.1, 19.0)                    | 17.0   |

**Web Figure 2a-f. Bangladesh Bland Altman Curves****2a. Bangladesh LMP vs Ultrasound**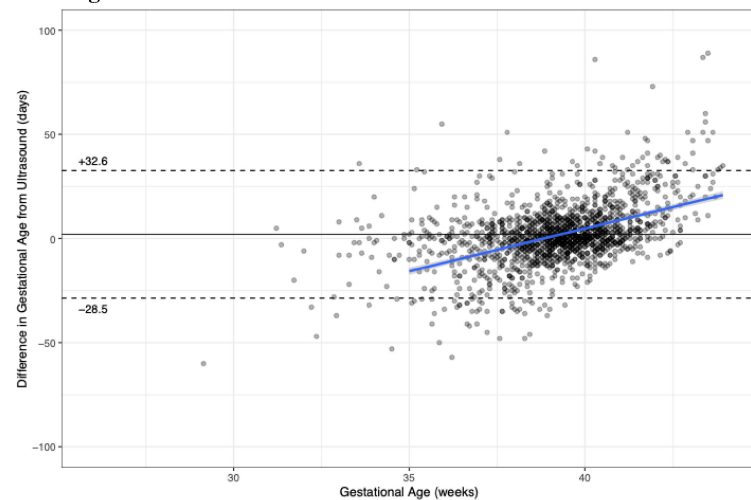**2b. Bangladesh Ballard vs Ultrasound**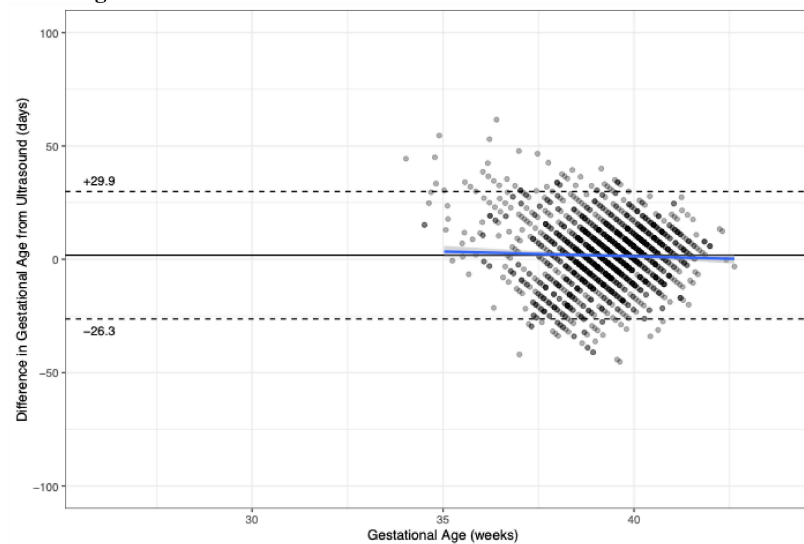

**2c. Bangladesh Model A vs Ultrasound**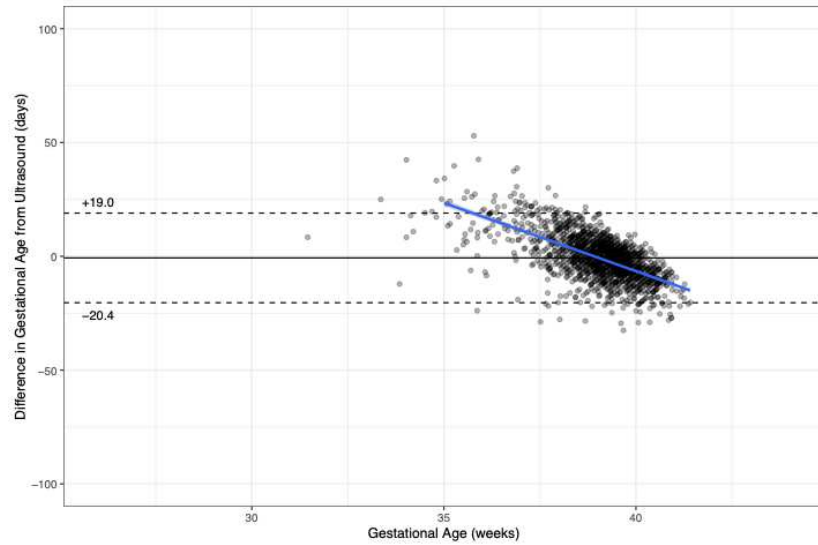**2d. Bangladesh Model B vs Ultrasound**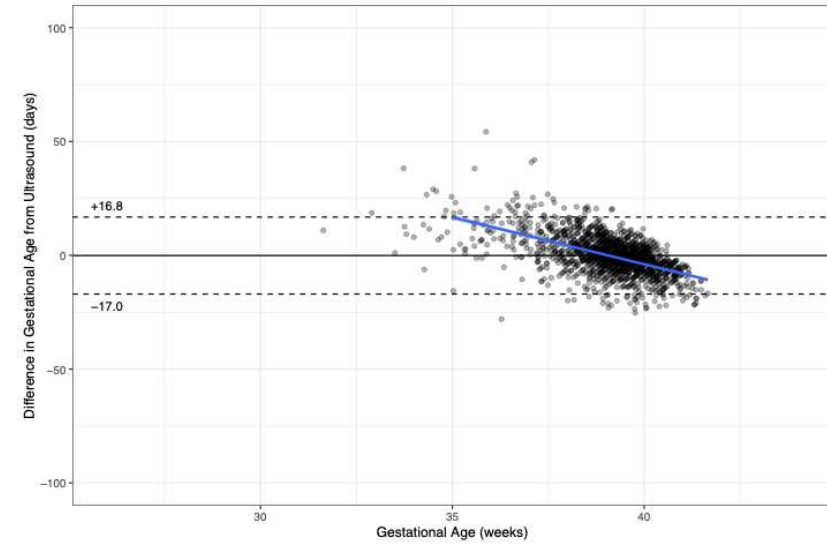**2e. Bangladesh Model C vs Ultrasound**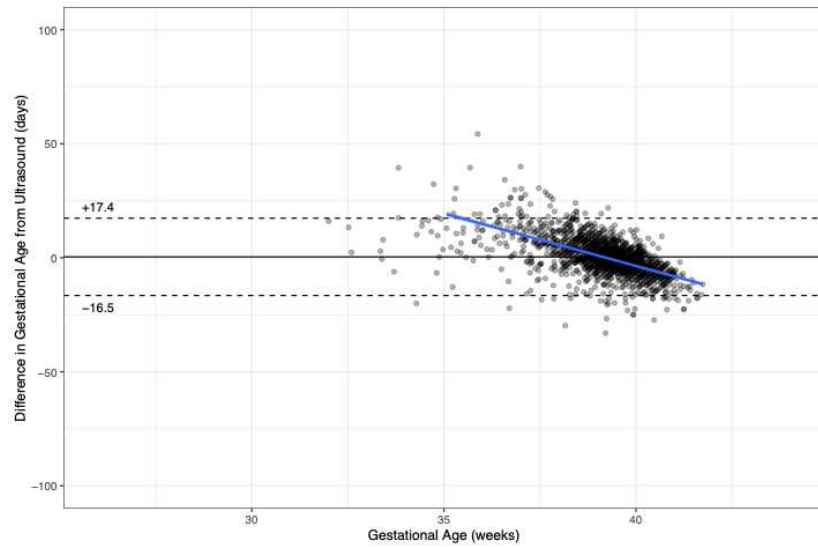**2f. Bangladesh Model D vs Ultrasound**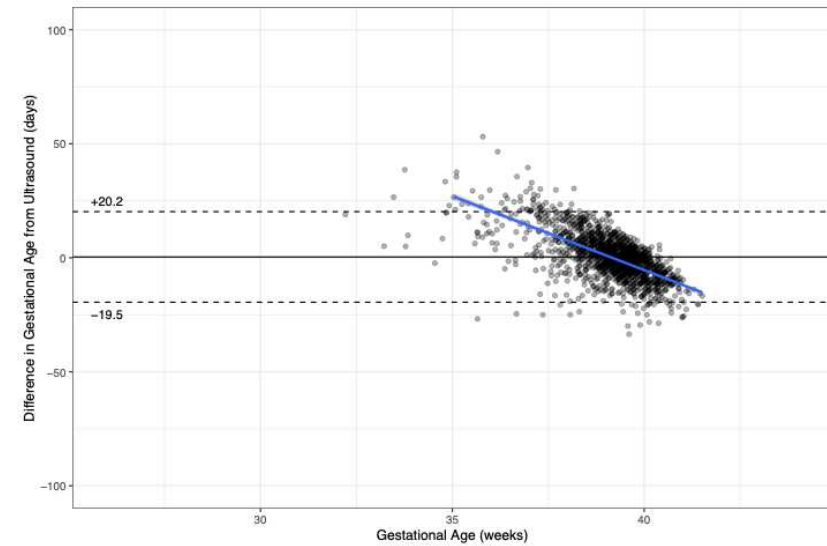

**Web Figure 3a-f. Ghana Bland Altman Curves****3a. Ghana LMP vs Ultrasound**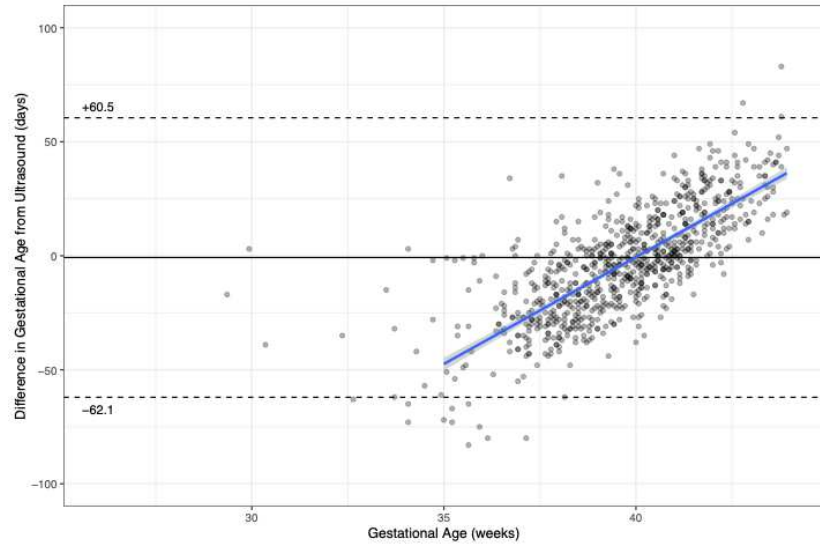**3b. Ghana Ballard vs Ultrasound**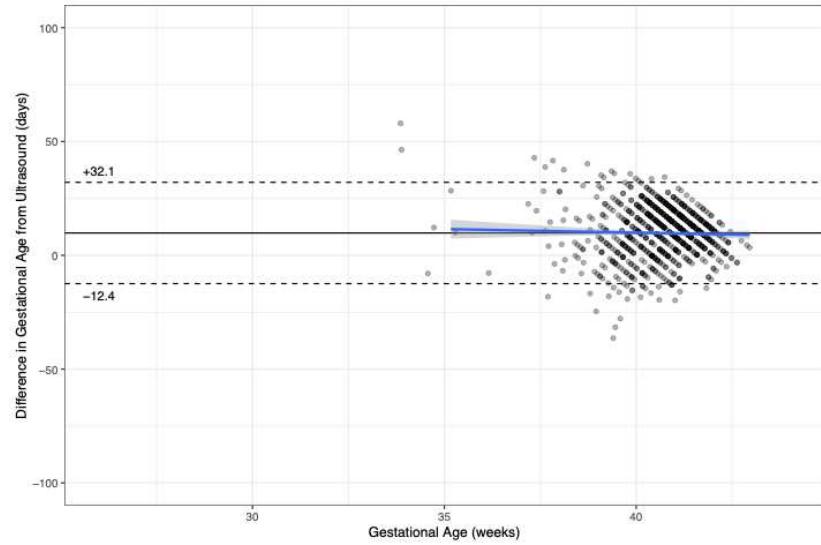**3c. Ghana Model A vs Ultrasound**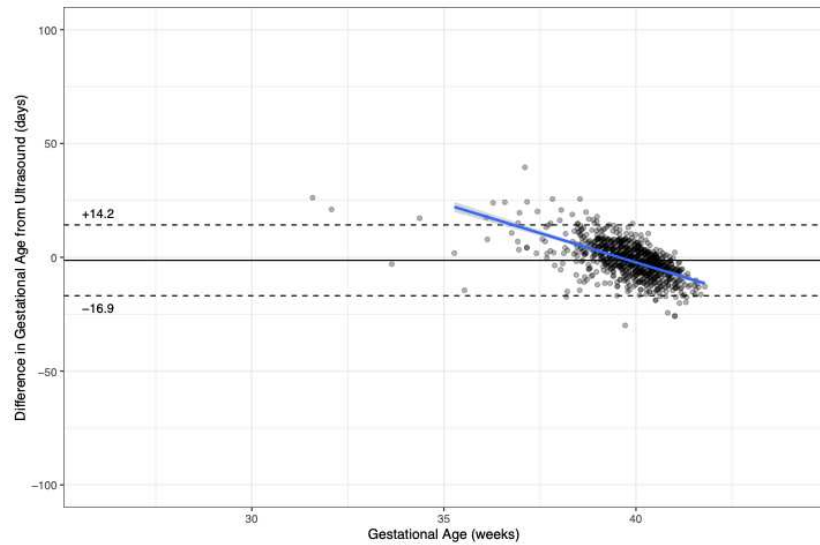**3d. Ghana Model B vs Ultrasound**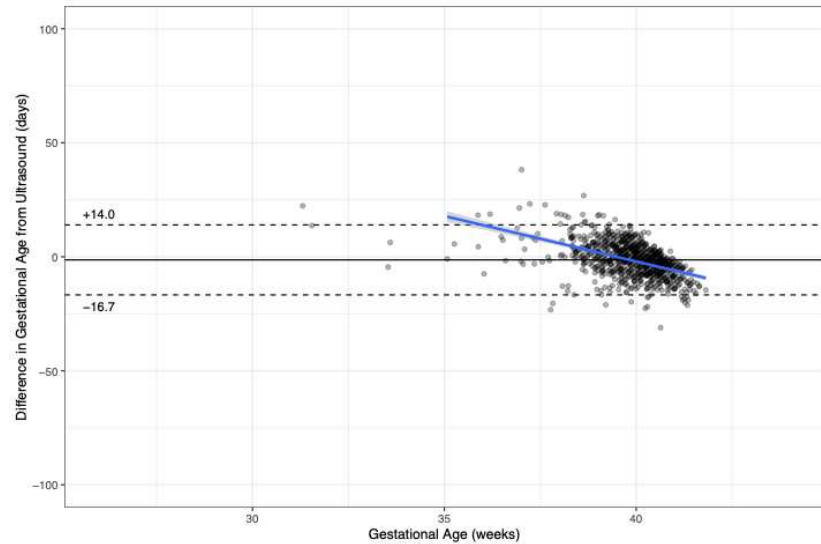

**3e. Ghana Model C vs Ultrasound**

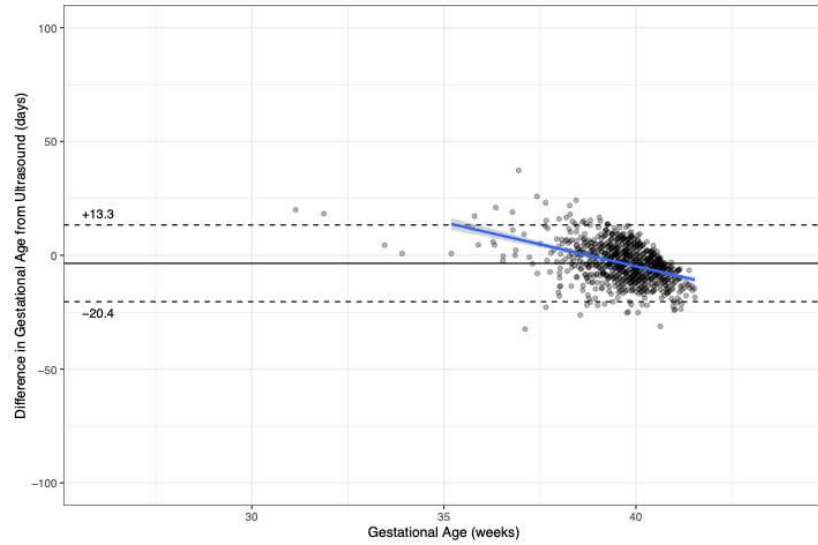

**3f. Ghana Model D vs Ultrasound**

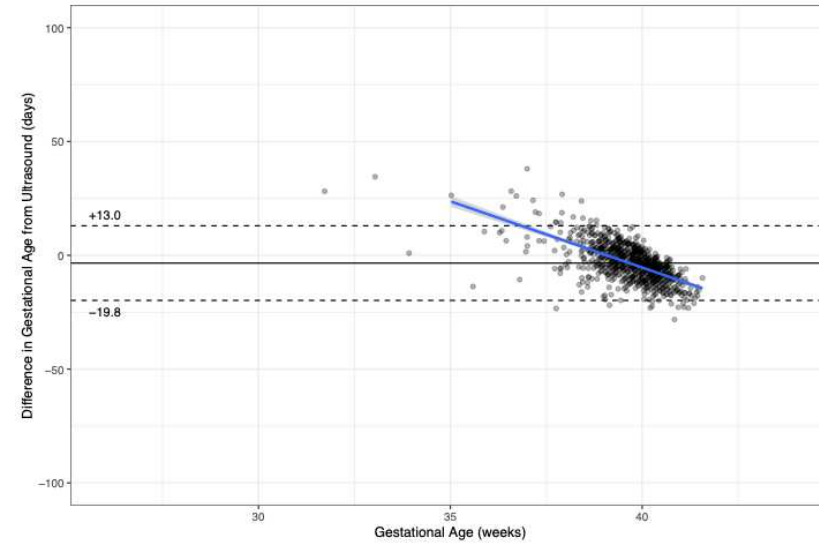

**Web Figure 4a-f. Pakistan (Karachi) Bland Altman Curves**

**4a. Karachi LMP vs Ultrasound**

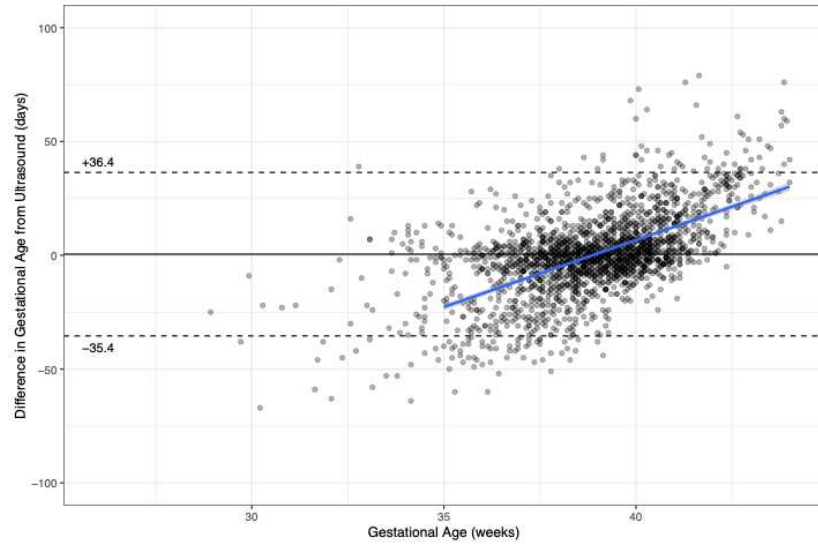

**4b. Karachi Ballard vs Ultrasound**

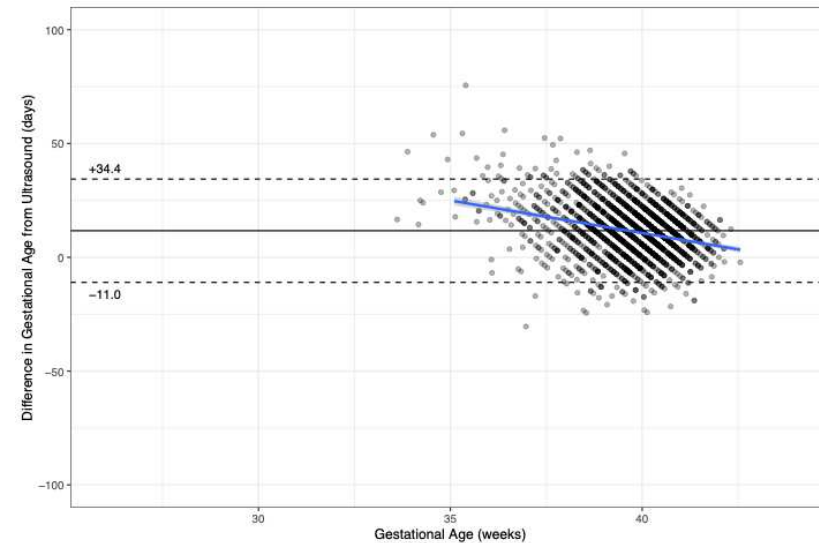



**4c. Karachi Model A vs Ultrasound**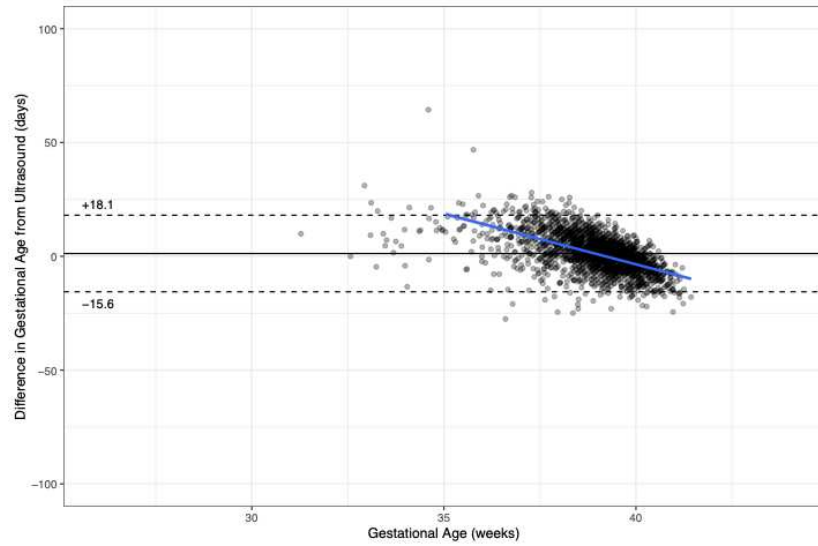**4d. Karachi Model B vs Ultrasound**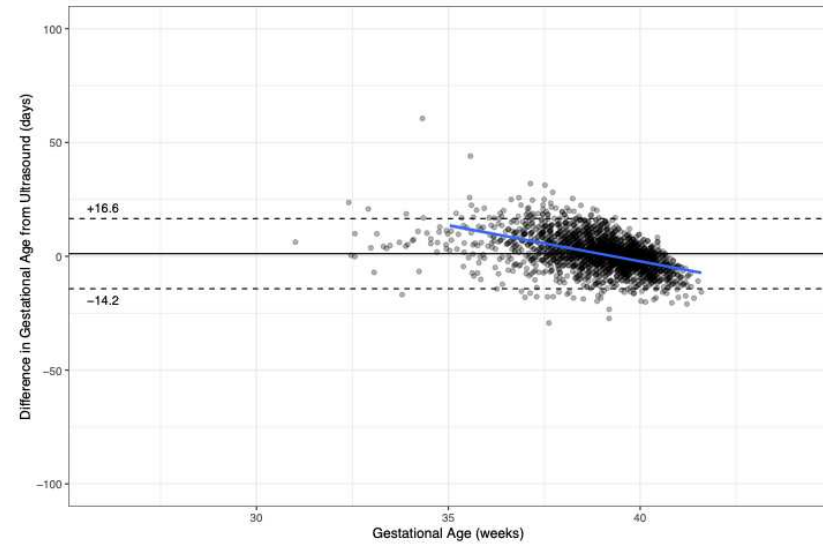**4e. Karachi Model C vs Ultrasound**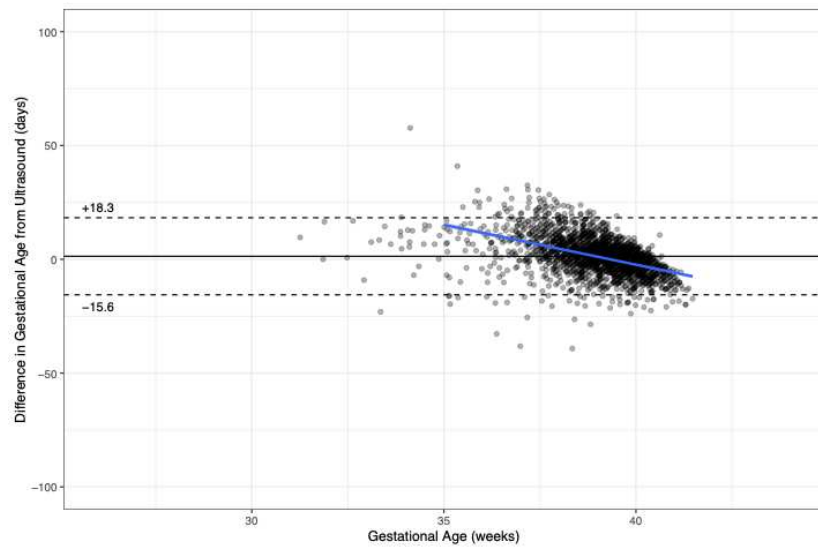**4f. Karachi Model D vs Ultrasound**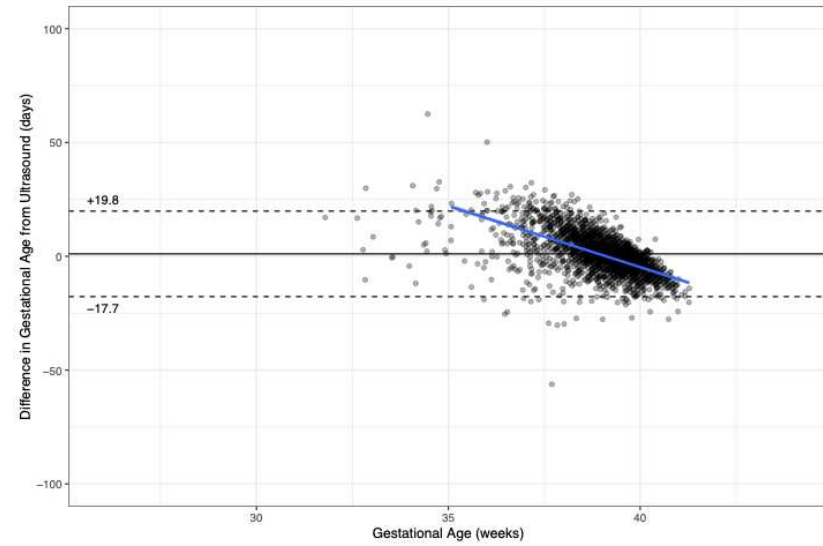

**Web Figure 5a-f. Tanzania (Pemba) Bland Altman Curves**

**5a. Pemba LMP vs Ultrasound**

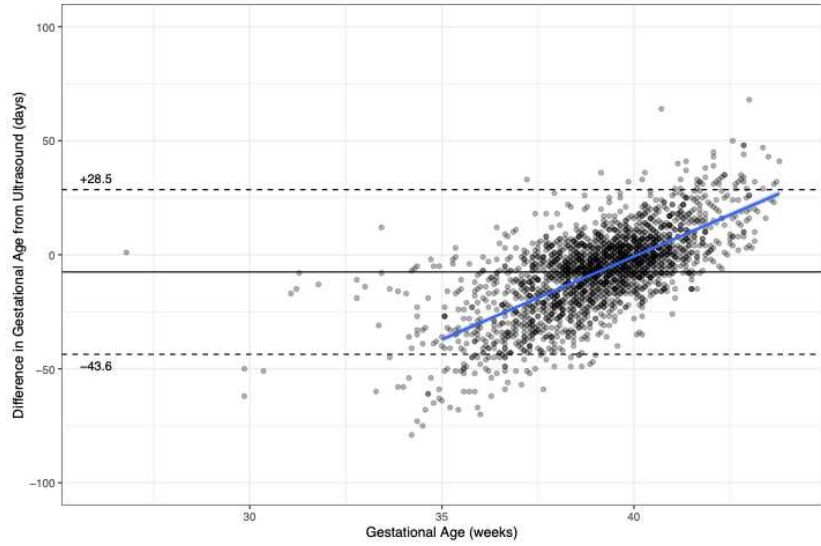

**5b. Pemba Ballard vs Ultrasound**

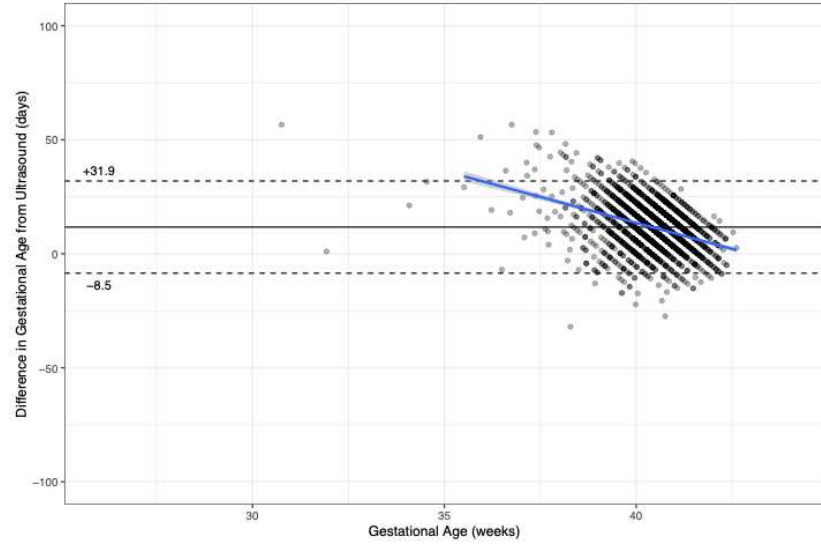

**5c. Pemba Model A vs Ultrasound**

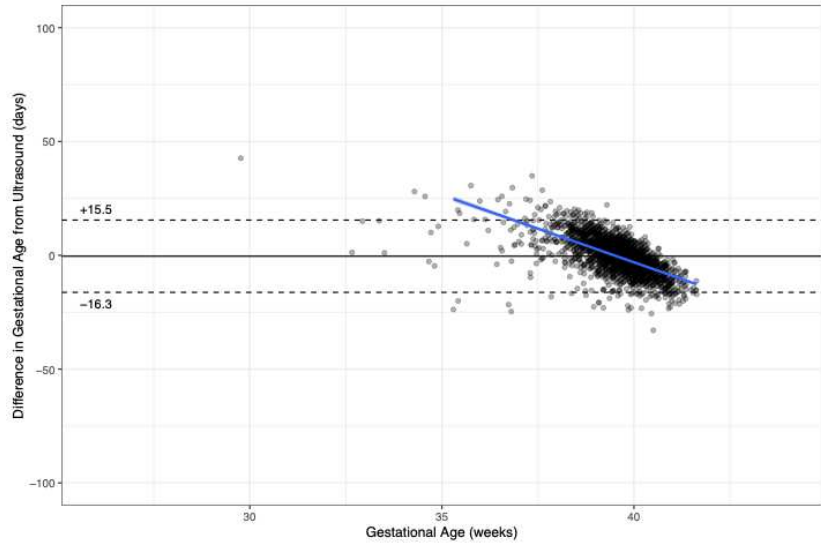

**5d. Pemba Model B vs Ultrasound**

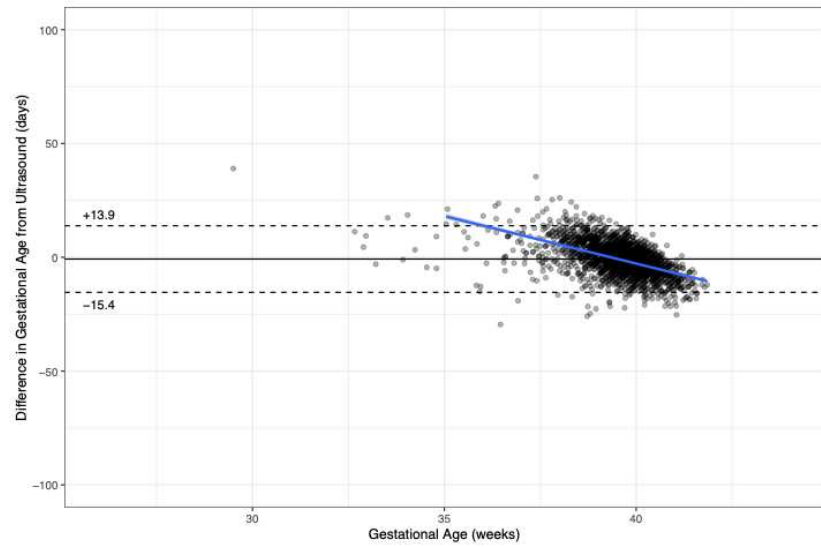

**5e. Pemba Model C vs Ultrasound**

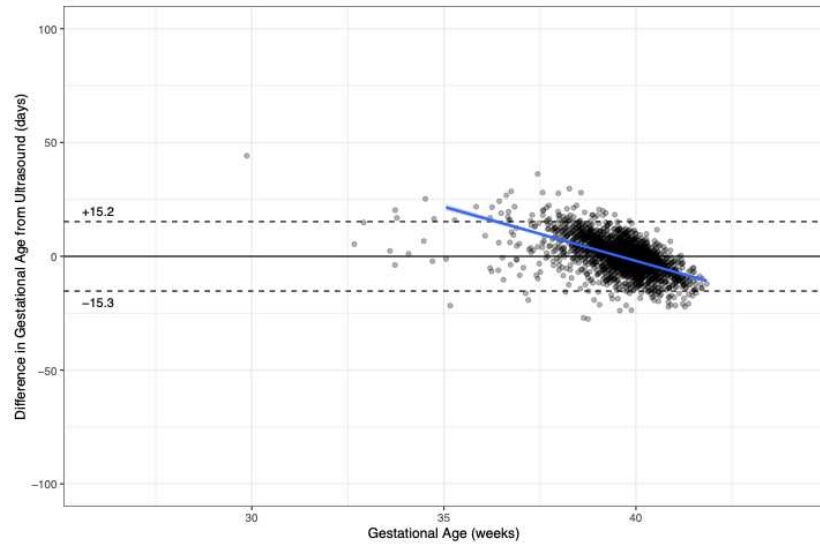

**5f. Pemba Model D vs Ultrasound**

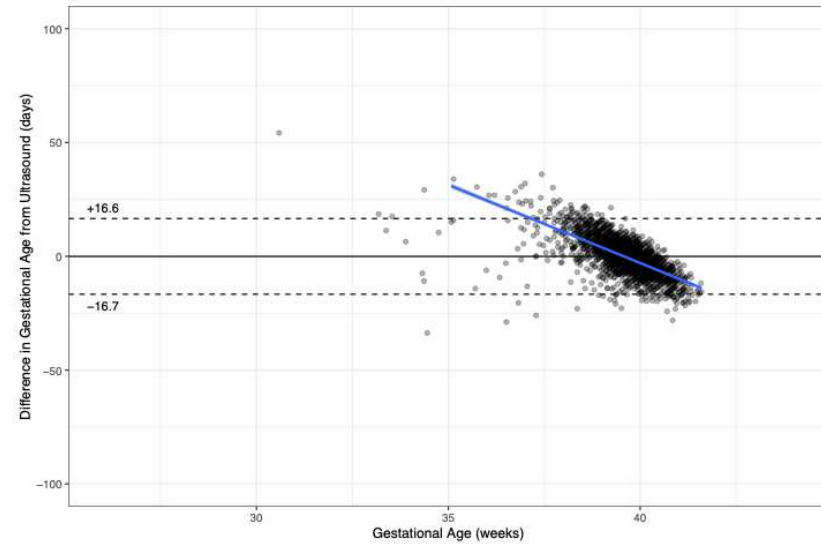

**Web Figure 6a-f. Zambia Bland Altman Curves**

**6a. Zambia LMP vs Ultrasound**

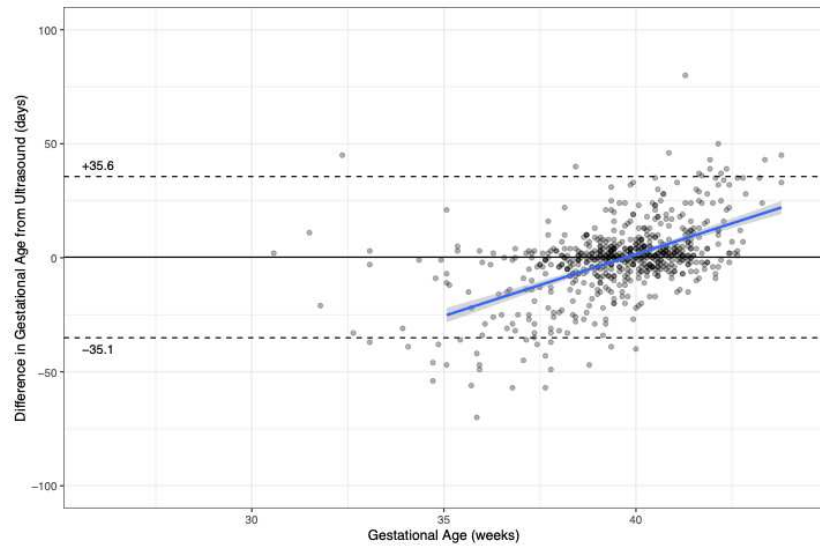

**6b. Zambia Ballard vs Ultrasound**

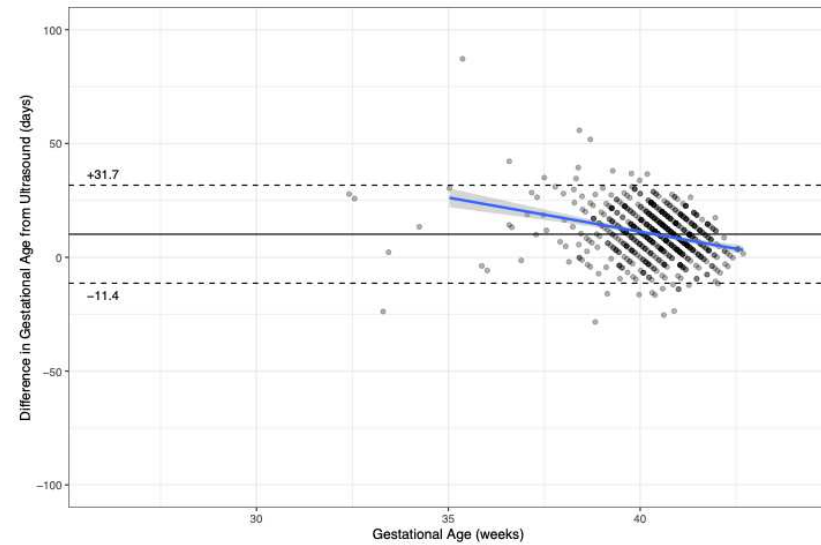

**6c. Zambia Model A vs Ultrasound**

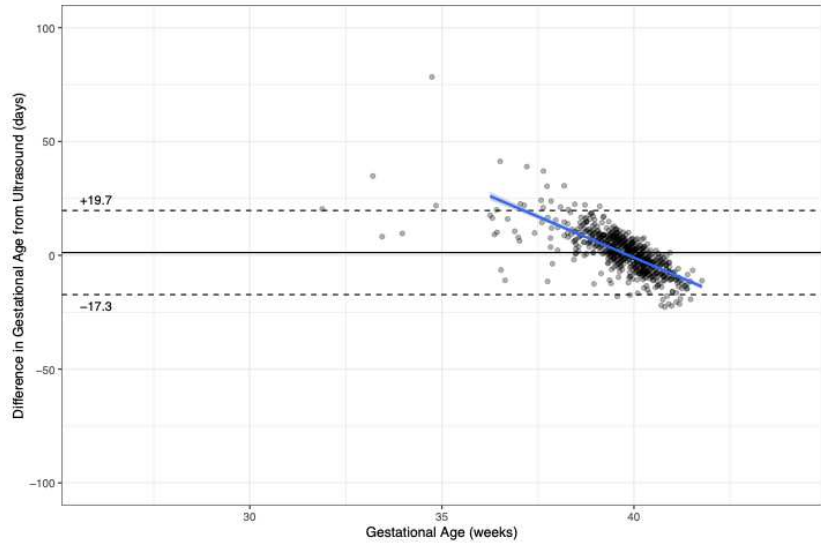

**6d. Zambia Model B vs Ultrasound**

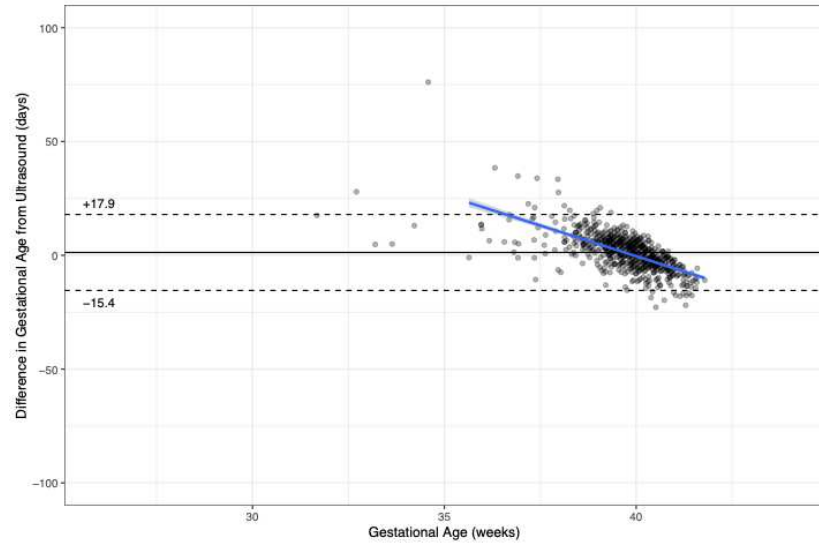

**6e. Zambia Model C vs Ultrasound**

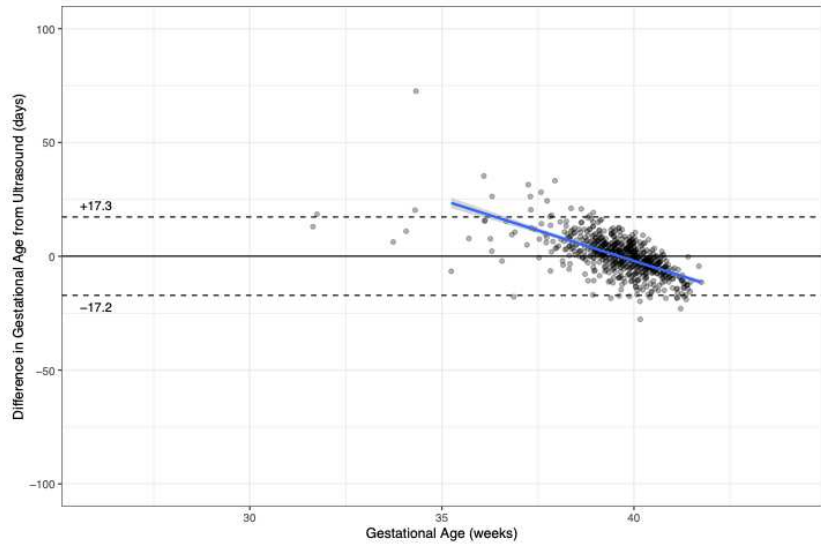

**6f. Zambia Model D vs Ultrasound**

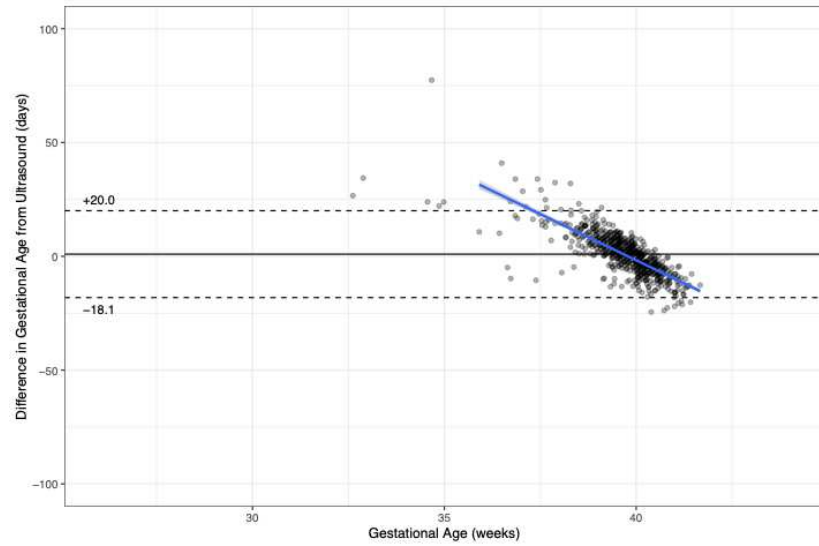

**Web Figure 7a-e. Receiver Operating Curves for the Identification of Preterm Births (<37 weeks)****WHO AMANHI Cohorts - Site Specific Data****7a. Bangladesh**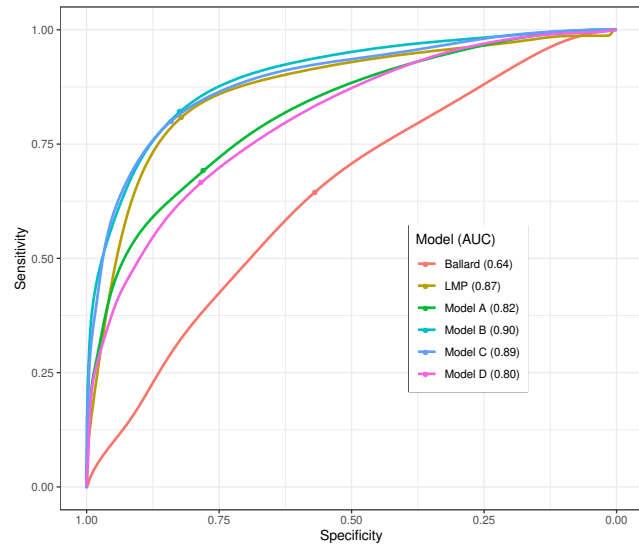**7b. Ghana**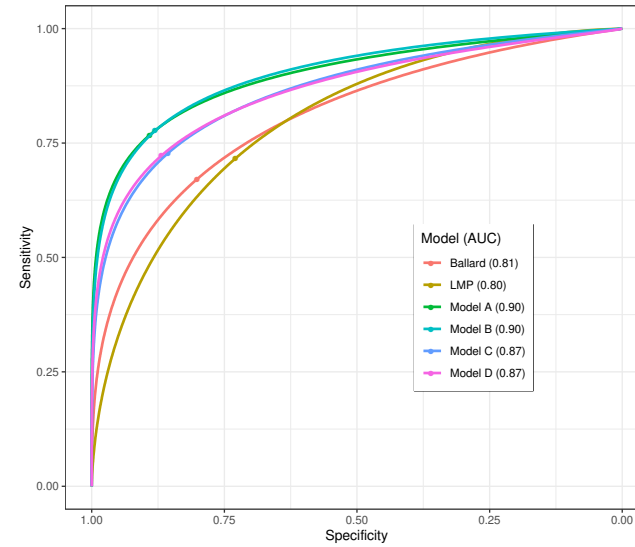**7c. Pakistan (Karachi)**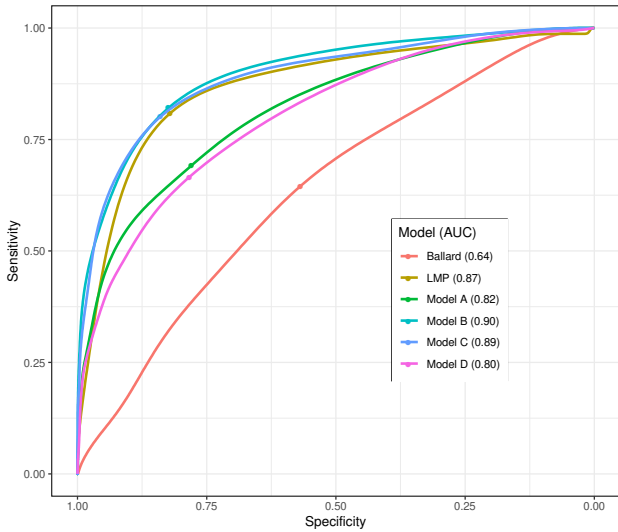**7d. Tanzania (Pemba)**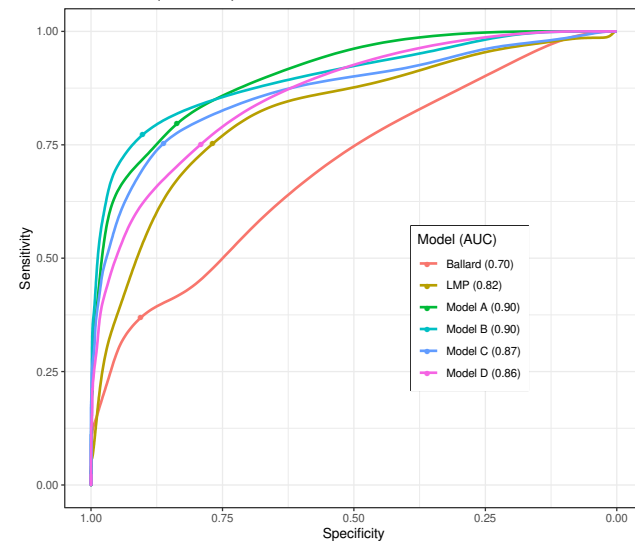

## 7e. Zambia

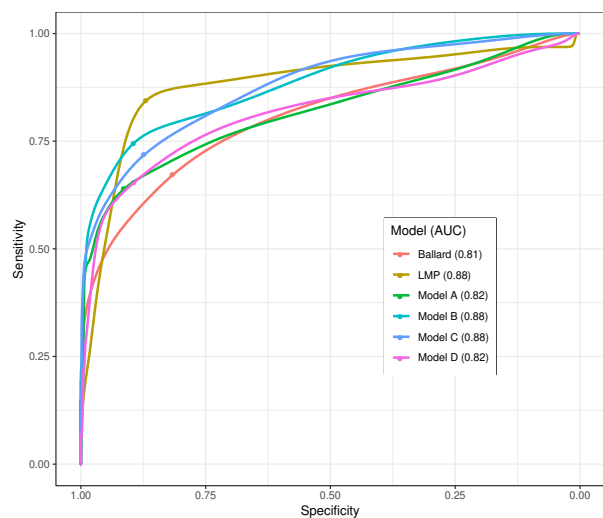

## Web Figure 8.a-e Receiver Operating Curves for the Identification of Preterm Births (&lt;34 weeks)

## WHO AMANHI Cohorts - Site Specific Data

## 8a. Bangladesh

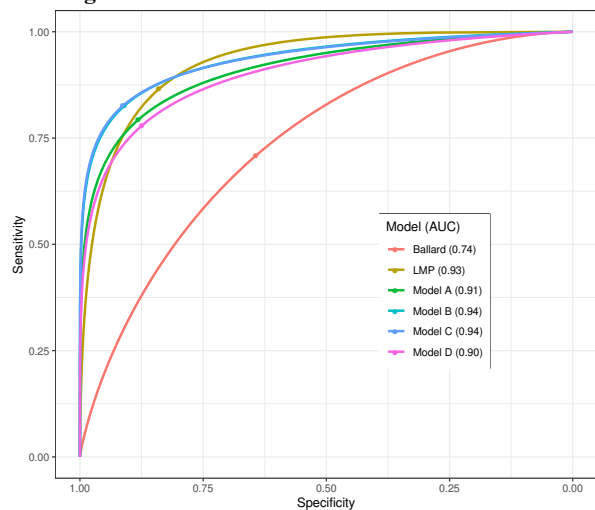

## 8b. Ghana

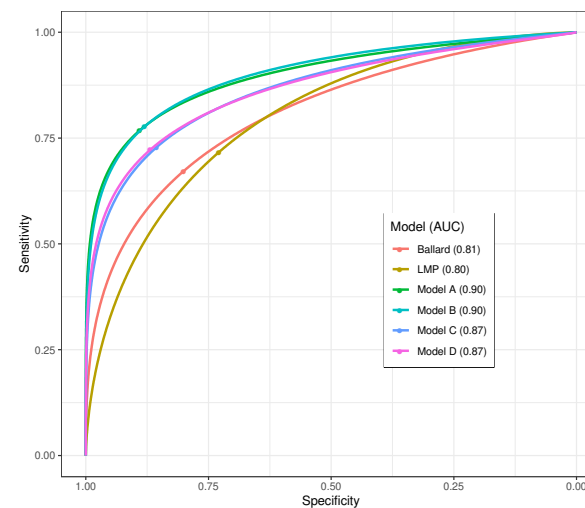

**8c. Pakistan (Karachi)**

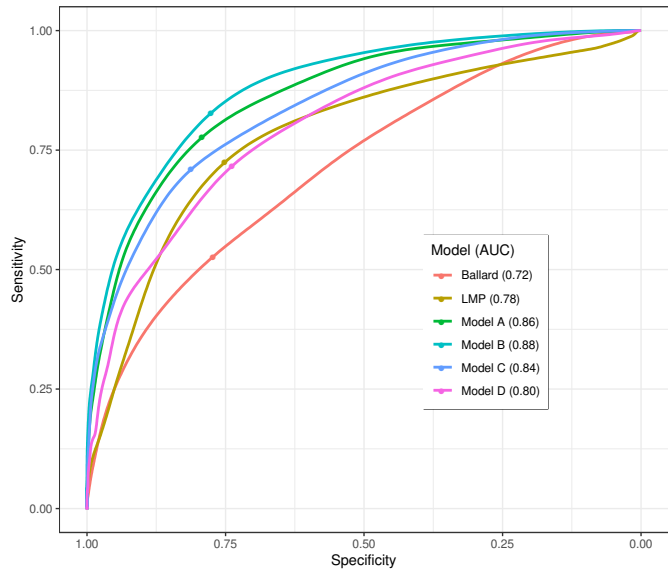

**8d. Tanzania (Pemba)**

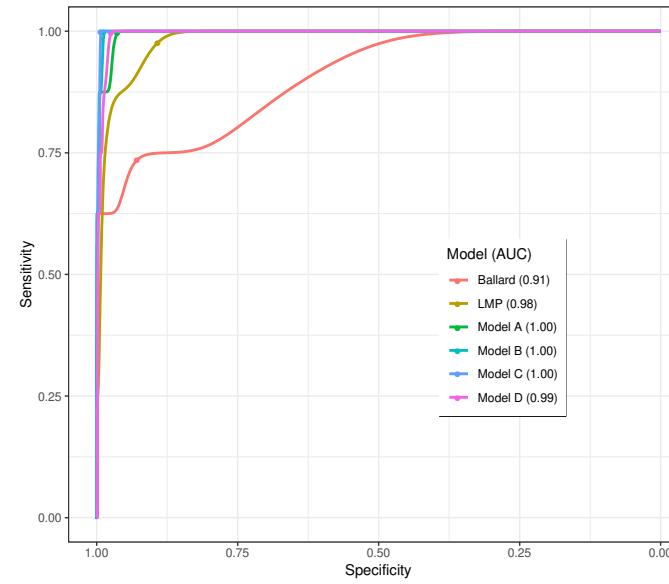

**8e. Zambia**

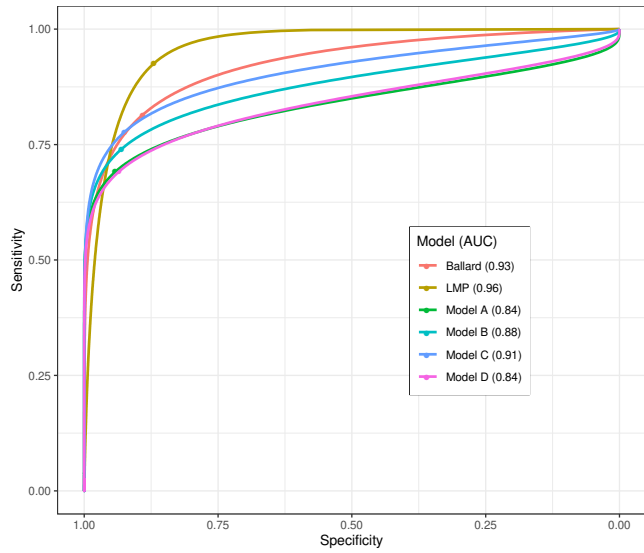

### Web Figure 9a-d. ROC Curves by AGA and SGA status for classification of infants <37 weeks and <34 weeks

**9a. Preterm (<37 weeks) classification among AGA infants**

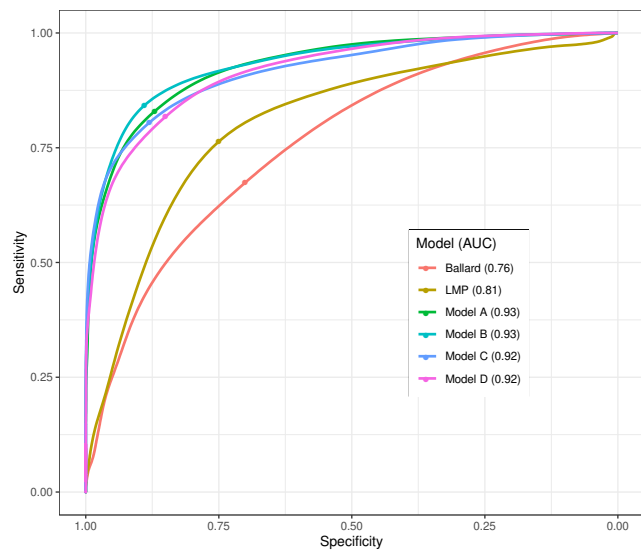

**9b. Preterm (<37 weeks) classification among SGA infants**

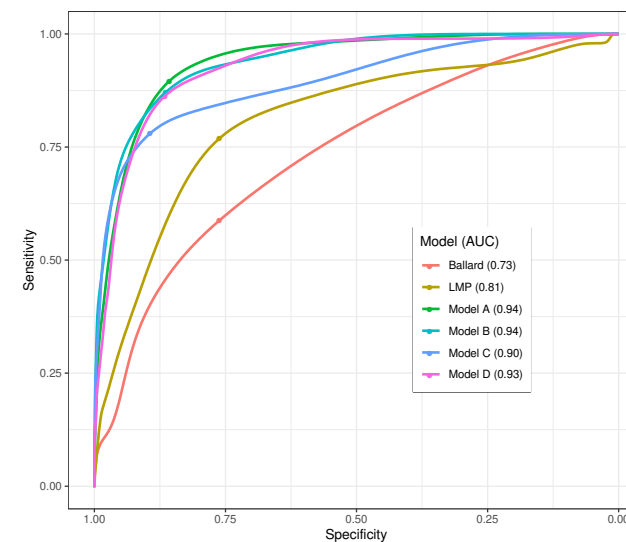

**9c. Early preterm (<34 wk) classification among AGA infants**

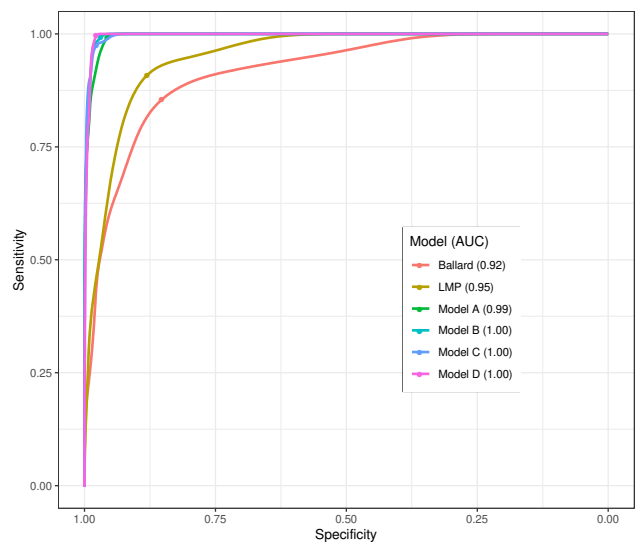

**9d. Early preterm (<34 wk) classification among SGA infants**

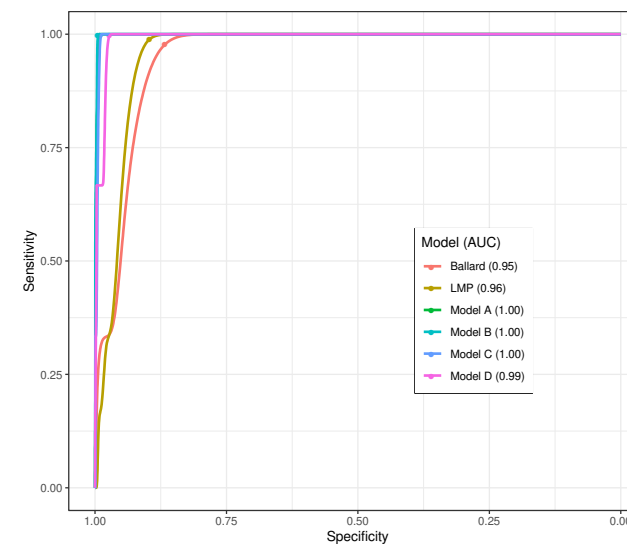

Supplement: bmjgh-2021-005688supp001.pdf [file bmjgh-2021-005688supp001.pdf]
